# Supplementary material for: Robo recruitment of the Wave regulatory complex plays an essential and conserved role in midline repulsion
Source: eLife. 2021 Apr 12;10:e64474. doi: 10.7554/eLife.64474 (PMC8096436; doi:10.7554/eLife.64474)
Supplement: Figure 3—source data 1. — Related to Figure 3E, F, H. Also, Figure 3—figure supplement 1C. [file elife-64474-fig3-data1.xlsx]

## Sheet: Sheet1
Robo and HSPC300 interaction
	Robo	RoboΔWIRS
Values for MYC intensity in IP	1	0.664335
normalized to MYC intensity in lysate	1	0.480673
and GFP intensity in IP	1	0.657676
	1	0.512025
Robo and HSPC300 interaction in the present of Slit
	Robo + mock CM	RoboΔWIRS + mock CM	Robo + slit CM	RoboΔWIRS + slit CM
Values for MYC intensity in IP	1	0.42278	5.81402	2.66941
normalized to MYC intensity in lysate	1	1.23628	3.22536	2.67673
and GFP intensity in IP	1	1.29302	2.16618	1.0534
	1	0.525772	1.31244	0.160473
	1		7.40289
	1		3.45625
Robo and HSPC300 interaction in embryonic lysates
	Robo	RoboΔWIRS
Values for HA intensity in IP	1	0.74904
normalized to HA intensity in lysate	1	0.149734
and GFP intensity in IP	1	0.213605
	1	0.935643
	1	0.76382
Robo2 and HSPC300 interaction
	Robo2	Robo2ΔWIRS
Values for MYC intensity in IP	1	0.14438
normalized to MYC intensity in lysate	1	0.0551599
and GFP intensity in IP
