# Supplementary material for: Robo recruitment of the Wave regulatory complex plays an essential and conserved role in midline repulsion
Source: eLife. 2021 Apr 12;10:e64474. doi: 10.7554/eLife.64474 (PMC8096436; doi:10.7554/eLife.64474)
Supplement: Figure 6—source data 1. — Related to Figure 6E, G. [file elife-64474-fig6-data1.xlsx]

## Sheet: Sheet1
Robo and Arp3 interaction
	Robo	RoboΔWIRS
Values for MYC intensity in IP	1	0.212375
normalized to MYC intensity in lysate	1	0.29905
and GFP intensity in IP	1	0.769368
	1	0.65867
	1	0.344076
	1	0.870929
	1	0.573925
Robo and Arp3 interaction in the present of Slit
	Robo + mock CM	RoboΔWIRS + mock CM	Robo + slit CM	RoboΔWIRS + slit CM
Values for MYC intensity in IP	1	1.28534	6.67284	0.400116
normalized to MYC intensity in lysate	1	0.396735	2.42778	0.906364
and GFP intensity in IP	1	0.814563	1.42369	1.02711
	1	0.934807	1.34634	0.898459
	1	0.0988125	1.63774	0.390322
	1	0.931155	1.16938	1.07195
	1	0.230764	2.76193	1.34765
